# Supplementary material for: Impact of FLT3-ITD Insertion Length on Outcomes in Acute Myeloid Leukemia: A Propensity Score-Adjusted Cohort Study
Source: MDPI journal article supplement (doi:10.3390/biology11060916), 2022-06-15
Supplement: s1 [file s1]

# Supplemental Figures

**Figure S1:** Loveplot describing covariate balance before and after matching for different insertion lengths of *FLT3* mutated AML for OS

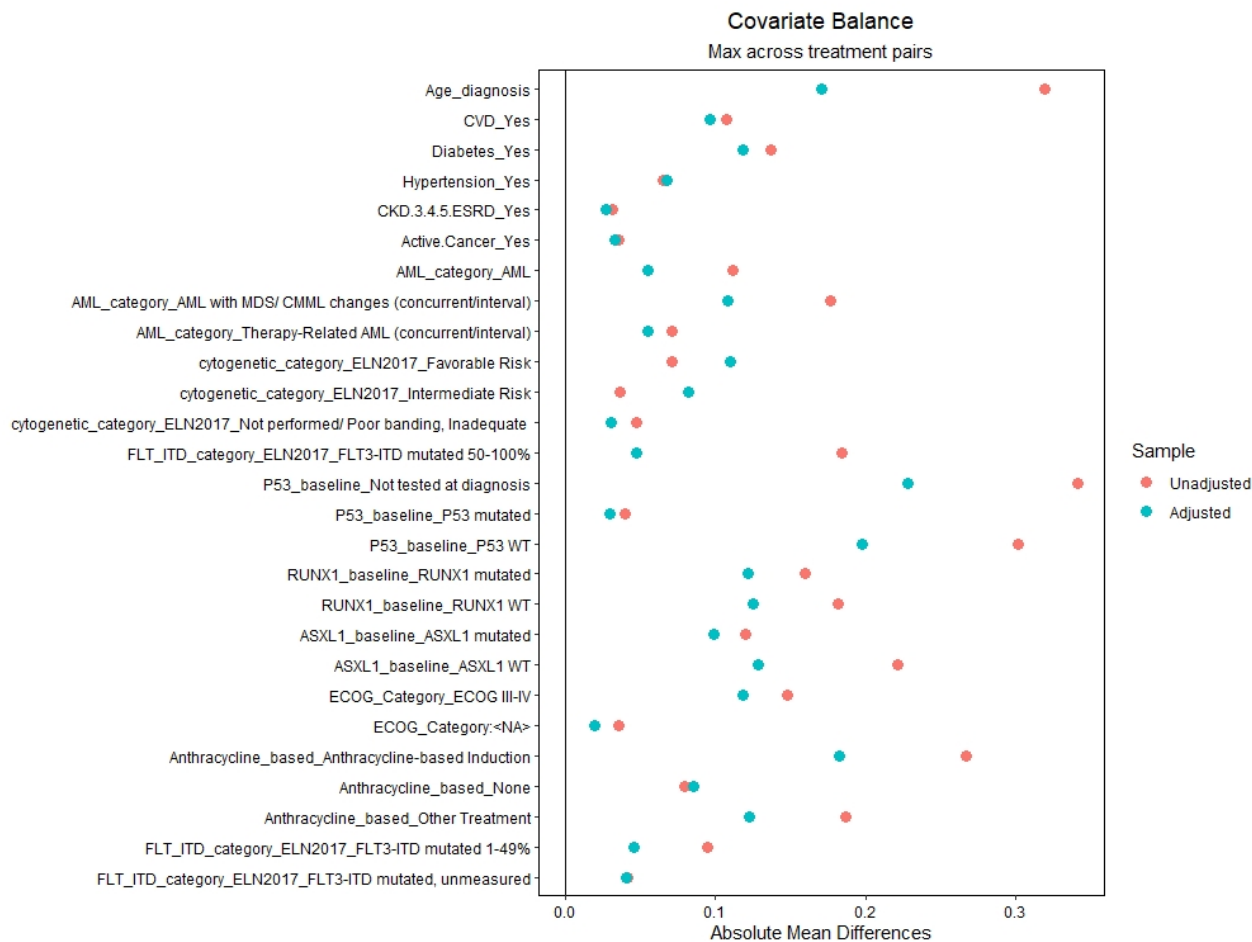

**Figure S2.** Loveplot describing covariate balance before and after matching for different insertion lengths of *FLT3* mutated AML for EFS

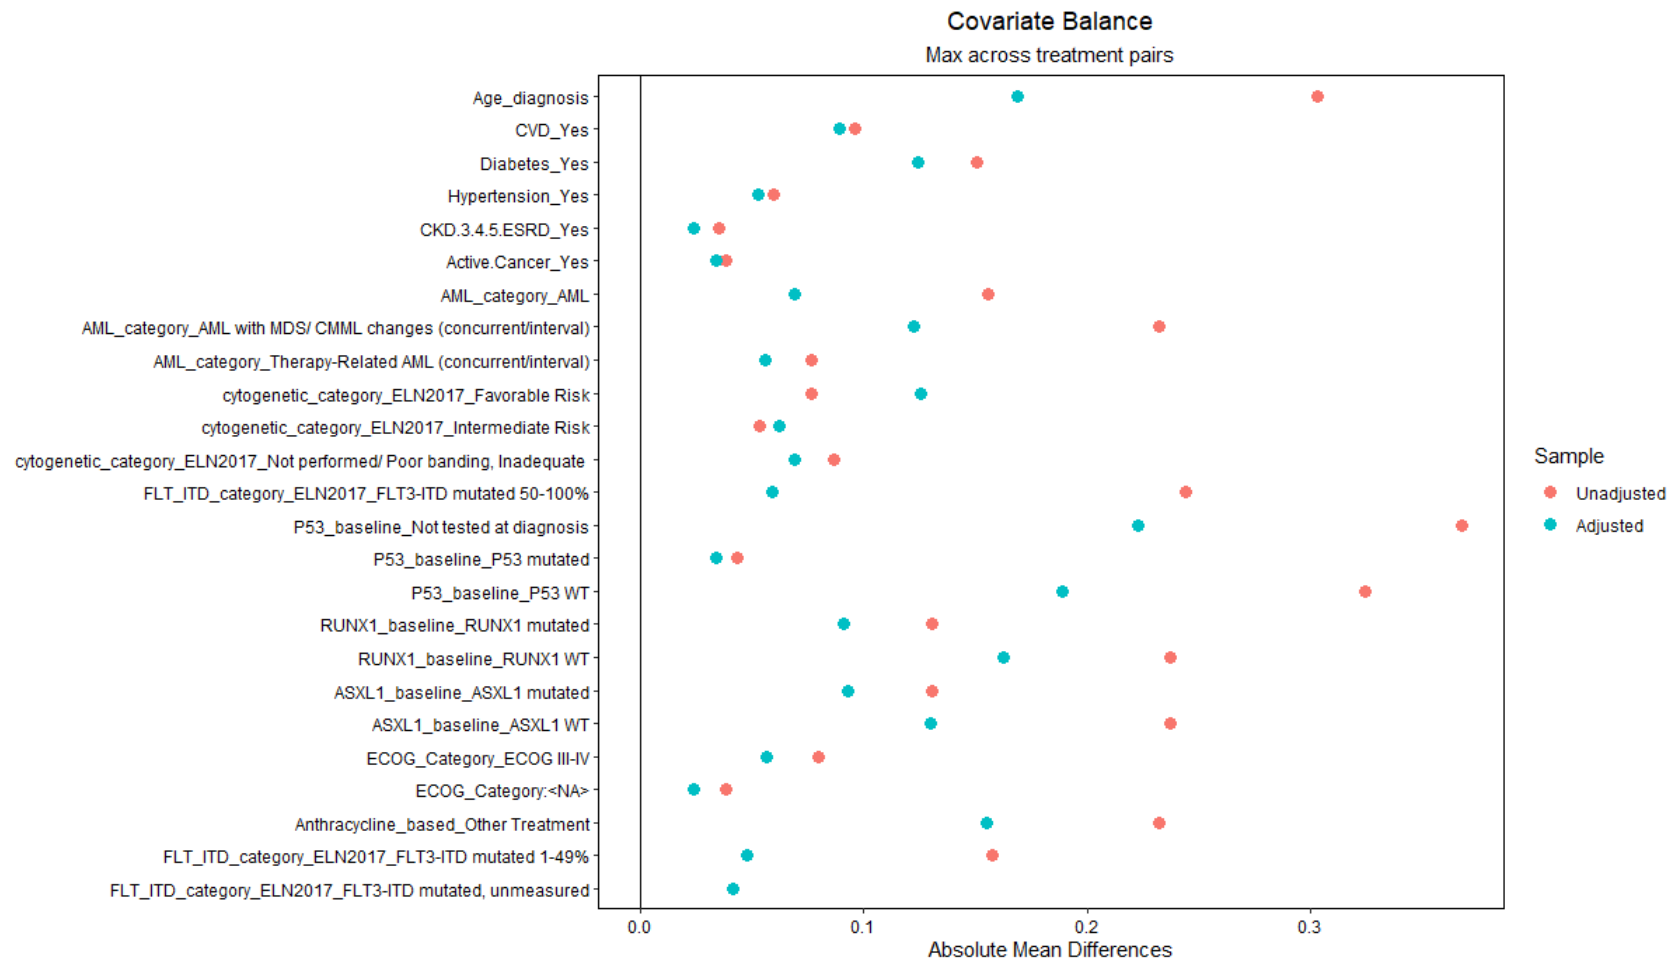

**Figure S3:** Loveplot describing covariate balance before and after matching for different insertion lengths of *FLT3* mutated and WT AML for OS

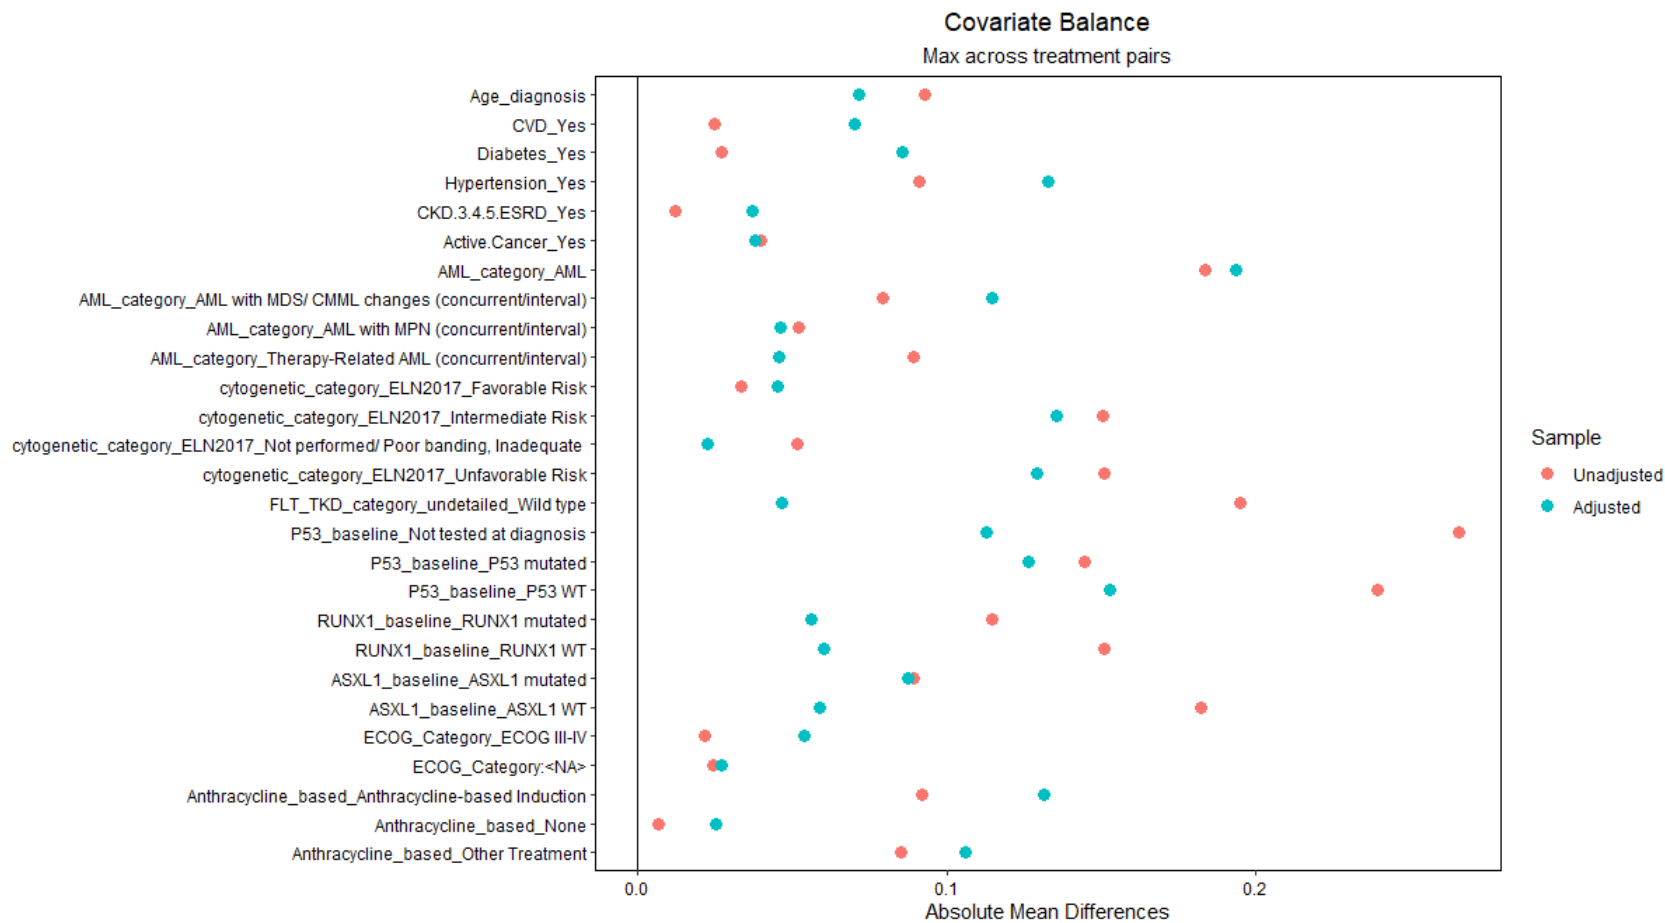

**Figure S4:** Propensity score-adjusted OS for patients with *FLT3*-ITD mutated and WT AML, categorized by insertion length

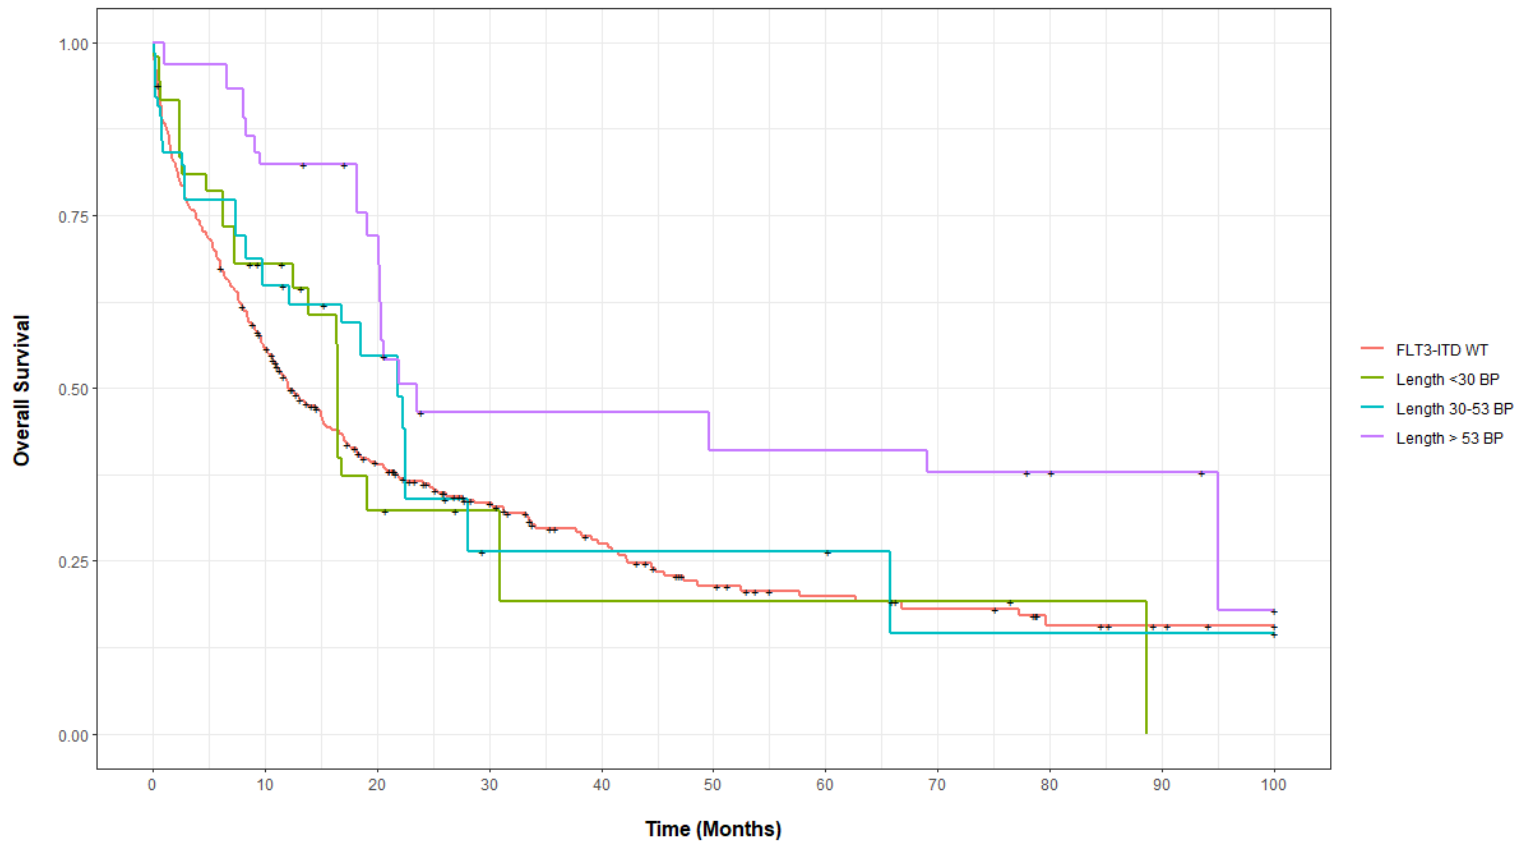

**Figure S5:** Unadjusted OS for patients with FLT3-ITD mutations, categorized by domain insertion expansion categories

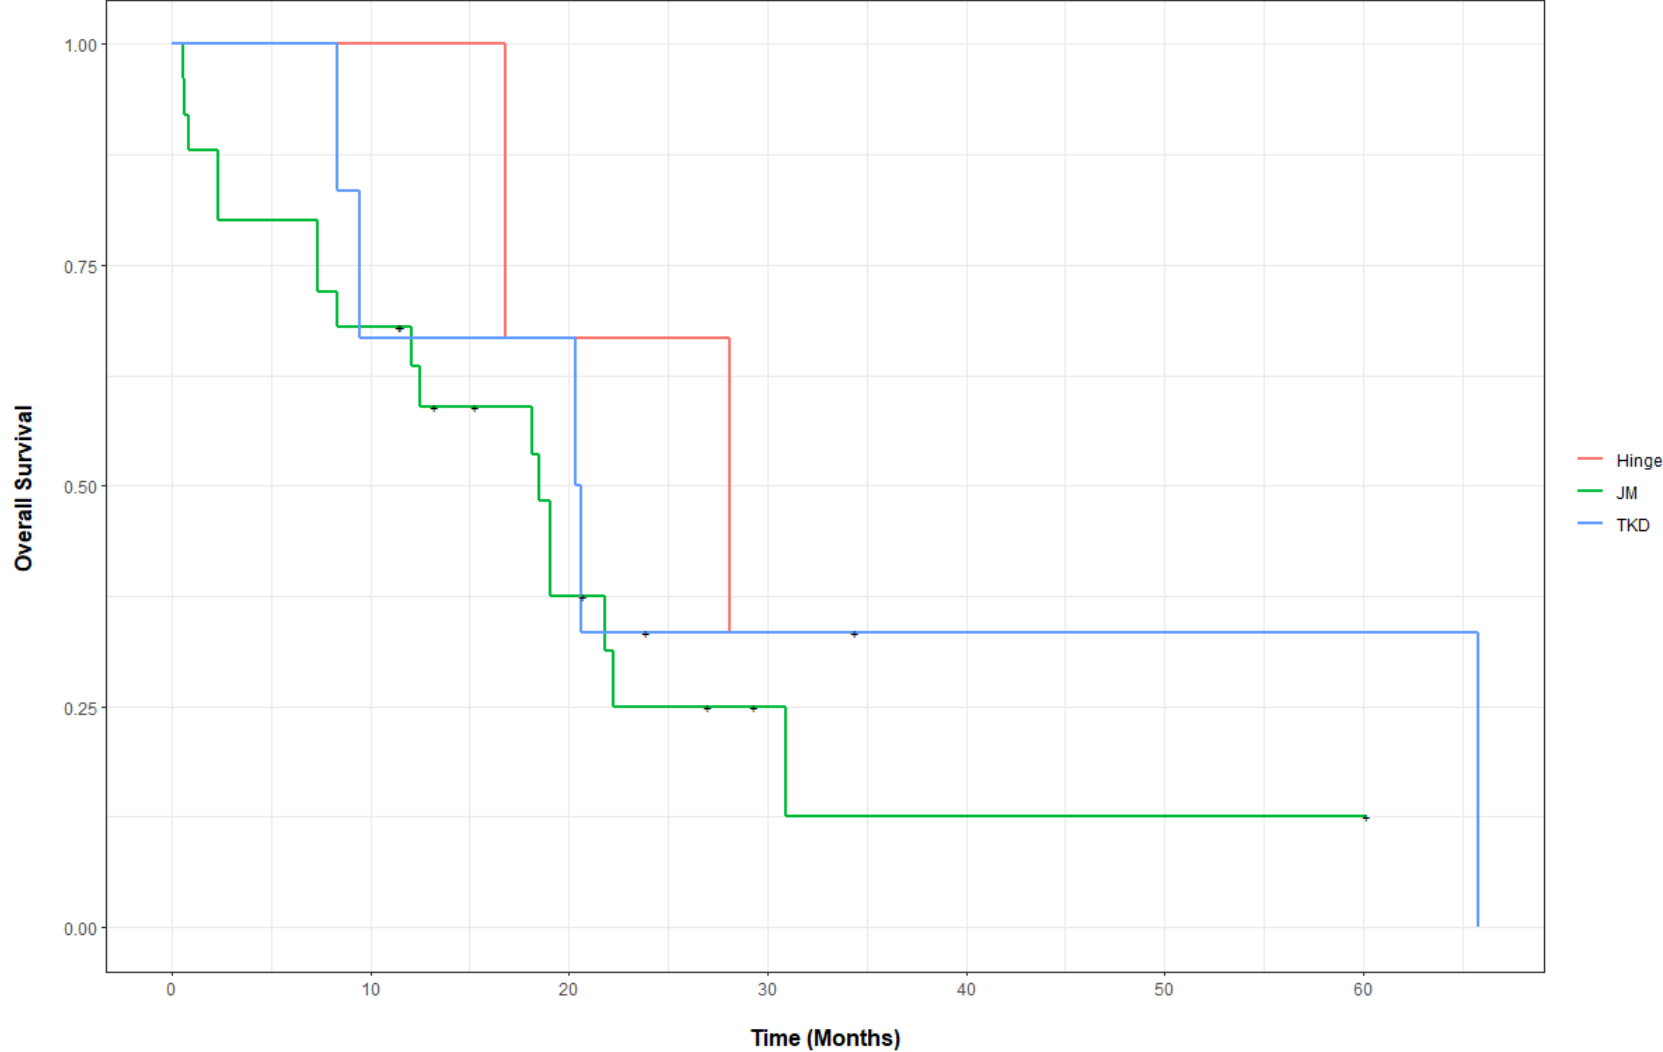

**Figure S6.** Unadjusted OS for patients with FLT3-ITD mutated AML treated with Midostaurin, categorized by insertion length

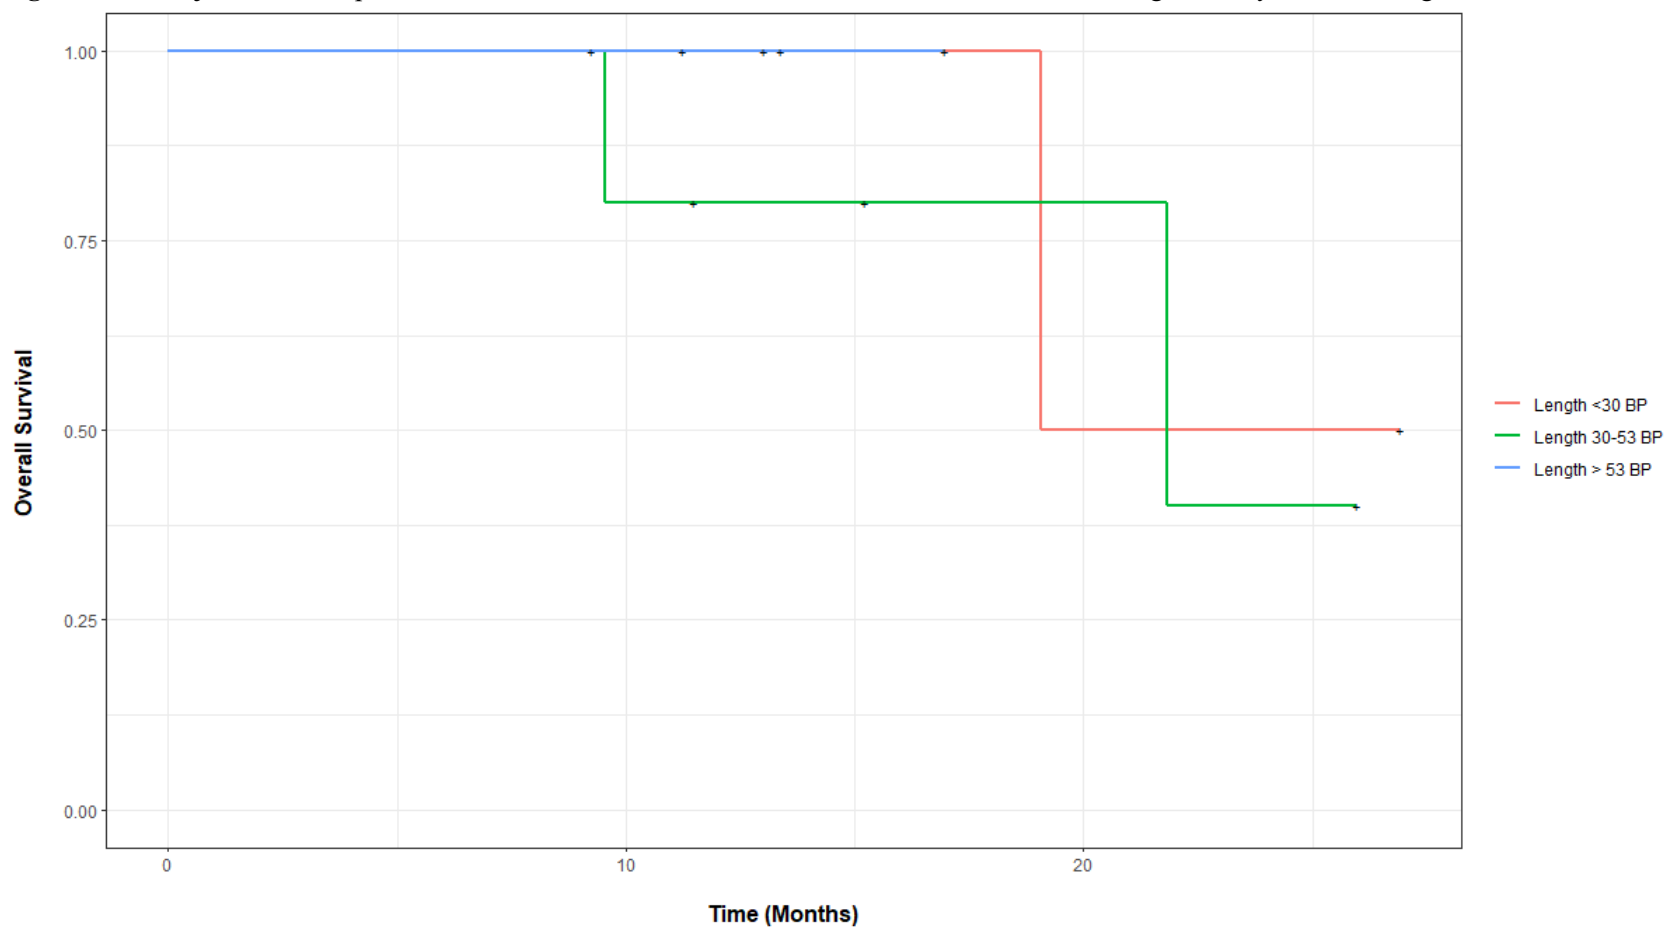

**Figure S7:** Unadjusted OS for patients with relapsed, refractory FLT3-ITD mutated AML treated with Gilteritinib, categorized by insertion length

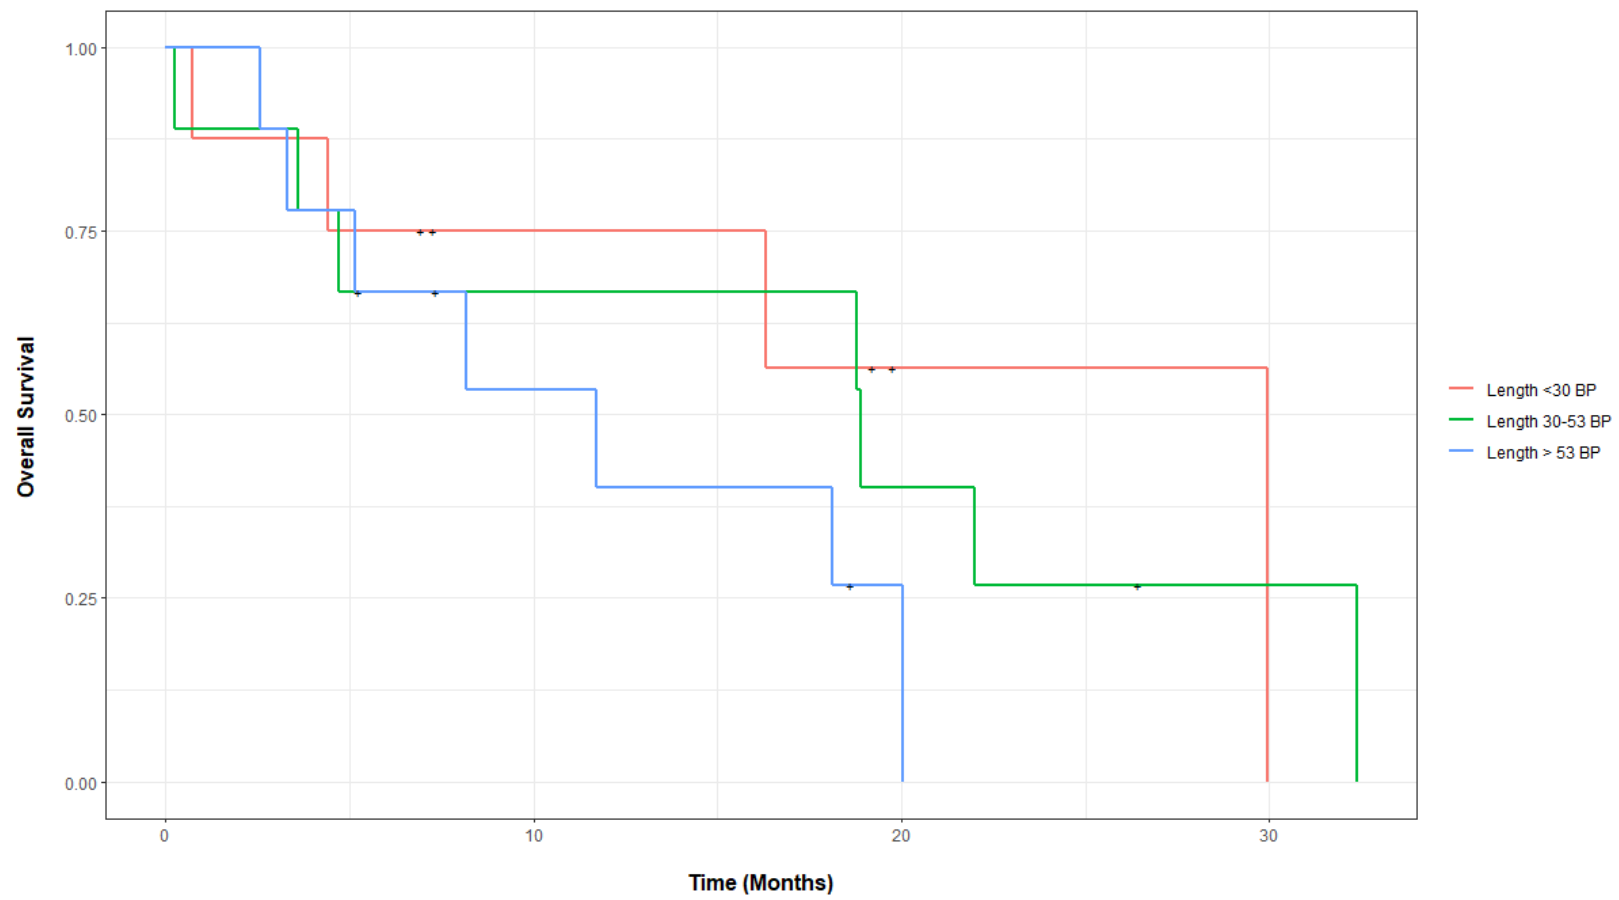

**Figure S8.** Unadjusted OS for patients with *FLT3*-ITD and *NPM1* mutated and WT AML, categorized by insertion length

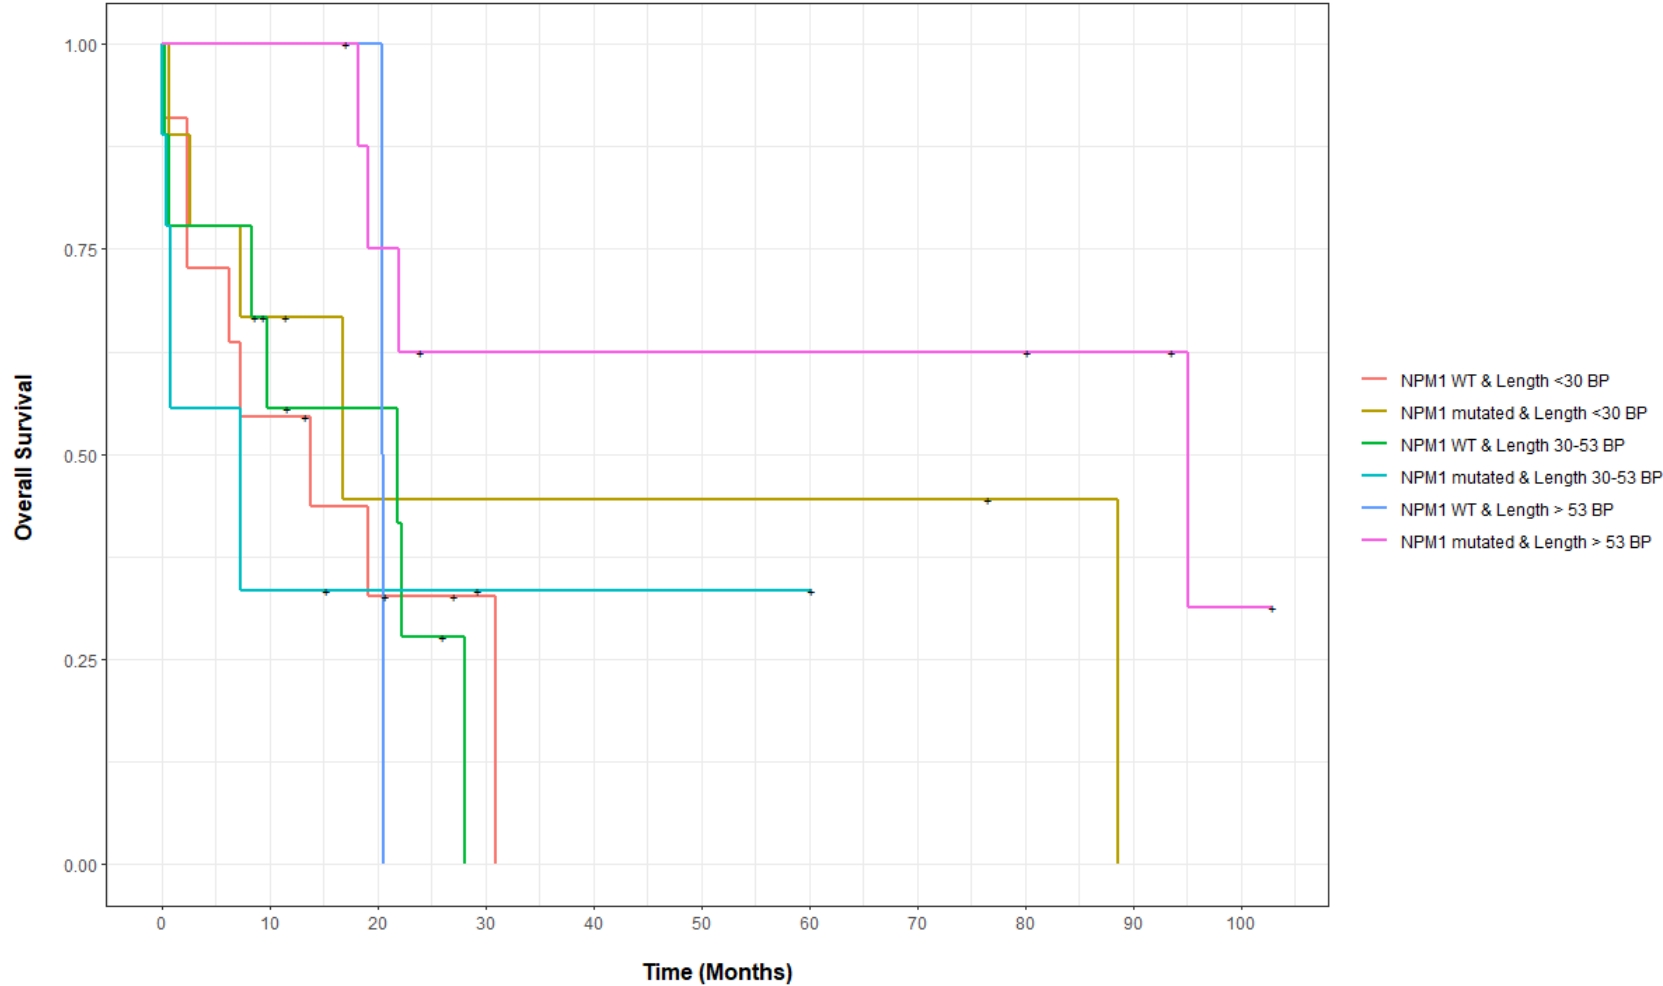



## Supplemental Tables

**Table S1.** Adjusted OS at years 1-2 for patients with *FLT3*-ITD mutated AML, categorized by insertion length

|   | strata          | time | Survival | Lower CI | Upper CI |
|---|-----------------|------|----------|----------|----------|
| 1 | Length <30 BP   | 12   | 0.66     | 0.50     | 0.88     |
| 2 | Length <30 BP   | 24   | 0.27     | 0.13     | 0.60     |
| 3 | Length 30-53 BP | 12   | 0.60     | 0.44     | 0.82     |
| 4 | Length 30-53 BP | 24   | 0.33     | 0.17     | 0.64     |
| 5 | Length >53 BP   | 12   | 0.75     | 0.58     | 0.95     |
| 6 | Length >53 BP   | 24   | 0.41     | 0.24     | 0.69     |

**Table S2.** Adjusted EFS at years 1-2 for patients with *FLT3*-ITD mutated AML, categorized by insertion length

|   | strata          | time | Survival | Lower CI | Upper CI |
|---|-----------------|------|----------|----------|----------|
| 1 | Length <30 BP   | 12   | 0.44     | 0.26     | 0.76     |
| 2 | Length <30 BP   | 24   | 0.17     | 0.06     | 0.46     |
| 3 | Length 30-53 BP | 12   | 0.32     | 0.16     | 0.62     |
| 4 | Length 30-53 BP | 24   | 0.18     | 0.07     | 0.47     |
| 5 | Length >53 BP   | 12   | 0.38     | 0.22     | 0.66     |
| 6 | Length >53 BP   | 24   | 0.31     | 0.16     | 0.60     |

**Table S3.** Unadjusted median OS in months for patients with *FLT3*-ITD and *NPM1* mutated AML, categorized by insertion length

|            | strata                         | Median (months) | Lower CI | Upper CI | P-Value |
|------------|--------------------------------|-----------------|----------|----------|---------|
| Unadjusted |                                |                 |          |          |         |
| 1          | <i>NPM1</i> WT & <30 BP        | 13.8            | 6.2      | NA       | 0.2     |
| 2          | <i>NPM1</i> mutated & <30 BP   | 16.8            | 7.3      | NA       |         |
| 3          | <i>NPM1</i> WT & 30-53 BP      | 21.8            | 8.3      | NA       |         |
| 4          | <i>NPM1</i> mutated & 30-53 BP | 7.3             | 0.77     | NA       |         |
| 5          | <i>NPM1</i> WT & >53 BP        | 20.5            | 20.4     | NA       |         |
| 6          | <i>NPM1</i> mutated & >53 BP   | 95.1            | 21.9     | NA       |         |

**Table S4.** Unweighted multivariable cox proportional hazards for relative mortality of patients with *FLT3*-ITD and *NPM1* mutated AML

|                                         | HR   | Lower CI | Upper CI | P-Value |
|-----------------------------------------|------|----------|----------|---------|
| ITD length <sup>a</sup>                 | 0.99 | 0.96     | 1.0      | 0.34    |
| Age at diagnosis                        | 1.05 | 1.02     | 1.1      | <0.01   |
| <i>TP53</i> WT                          | 0.21 | 0.02     | 1.8      | 0.15    |
| <i>NPM1</i> WT                          | 0.96 | 0.26     | 3.5      | 0.94    |
| ITD length : <i>NPM1</i> WT interaction | 1.0  | 0.98     | 1.04     | 0.41    |

<sup>a</sup> ITD Length: modeled as a continuous variable.

**Table S5.** Unweighted multivariable cox proportional hazards for relative mortality of patients with *FLT3*-ITD and *NPM1* mutated AML

|                                  | HR   | Lower CI | Upper CI | P-Value |
|----------------------------------|------|----------|----------|---------|
| Length 30-53 BP <sup>a</sup>     | 1.6  | 0.49     | 5.5      | 0.42    |
| Length >53 BP <sup>a</sup>       | 0.48 | 0.11     | 2.1      | 0.33    |
| Age at diagnosis                 | 1.1  | 1.02     | 1.1      | <0.01   |
| <i>TP53</i> WT                   | 0.24 | 0.03     | 2.1      | 0.20    |
| <i>NPM1</i> WT                   | 1.70 | 0.53     | 5.5      | 0.36    |
| Length 30-53 BP : <i>NPM1</i> WT | 0.51 | 0.10     | 2.6      | 0.41    |
| Length >53 BP : <i>NPM1</i> WT   | 1.4  | 0.16     | 12.1     | 0.77    |

<sup>a</sup> Compared to Length <30 BP.
